1

2 **Are signals of aggressive intent less honest in urban habitats?**

3 Çağlar Akçay<sup>1, 2\*</sup>; Michelle L. Beck<sup>3, 2</sup>; Kendra B. Sewall<sup>2</sup>

4 1 Department of Psychology, Koç University, Istanbul, Turkey

5 2 Department of Biological Sciences, Virginia Tech, Blacksburg, VA, USA

6 3 Department of Biology, Rivier University, Nashua, NH, USA

7 \*corresponding author: [akcay.caglar@gmail.com](mailto:akcay.caglar@gmail.com)

8 Department of Psychology

9 Koc University

10 Rumelifeneri Kampusu, Sariyer 34450

11 Istanbul, Turkey

12

13 **Abstract**

14 The effect of urban noise on animal communication systems is one of the best examples of how  
15 anthropogenic change affects animal social behaviour. Urban noise often drives shifts in acoustic  
16 properties of signals but the consequences of noise for the honesty of signals – that is, how well  
17 they predict signaler behaviour, is unclear. Here we examine whether honesty of aggressive  
18 signaling changes in urban living song sparrows (*Melospiza melodia*). Aggressive signaling in  
19 song sparrows consists of close-range signals in two modalities that predict a subsequent attack:  
20 the low amplitude soft songs (an acoustic signal) and wing waves (a visual signal). Male song  
21 sparrows living in urban habitats display more territorial aggression than males living in rural  
22 habitats, but whether the honesty of close-range signals is affected by urbanization has not been  
23 examined. If soft songs are less effective in urban noise, we predict that they would be less  
24 reliably associated with attack in these habitats compared to rural habitats. We found that while  
25 acoustic noise was higher in urban habitats, the urban birds still sang more soft songs than rural  
26 birds during a simulated territorial intrusion. Furthermore, high rates of soft songs and low rates  
27 of loud songs predicted attacks in both habitats. Finally, we found evidence for a potential  
28 multimodal shift: urban birds tended to give proportionally more wing waves than soft songs  
29 than rural birds. These results indicate that urbanization might have a limited effect on the  
30 overall honesty of aggressive signals in song sparrows.

31 **Keywords: anthropogenic change, bird song, urban noise, honest signaling, song sparrow,**  
32 **multi-modal signaling**

### 33 **Introduction**

34           When individuals with conflicting interests communicate (e.g. during an aggressive  
35 interaction) there is an incentive for each signaler to try to manipulate the receiver into behaving  
36 in a way that benefits the signaler, thus jeopardizing the honesty of the signal (Dawkins and  
37 Krebs, 1978). This problem is particularly pronounced for signals of aggressive intent which are  
38 by definition not tied to a physical trait of the signaler. Instead they are thought to predict future  
39 behavior of the signaler. These signals are usually not costly to produce and can potentially be  
40 given at any level. A good example of this is bird song: singing seems to carry little or no  
41 metabolic cost compared to other activities birds have to carry out during an aggressive  
42 interaction (Zollinger et al., 2011).

43           Although early ethological literature assumed these signals of intent had to be honest –  
44 otherwise they would not exist – theoretical and empirical treatments of these signals in the  
45 1970s were more skeptical (Caryl, 1979; Dawkins and Krebs, 1978; Maynard Smith, 1974). The  
46 problem seemed to be that if signals are only indicative aggressive “intent” of the signaler and  
47 not tied to a physical cost, then the signals would be easy to cheat for “bluffers” who would  
48 threaten without any intention to follow through with an attack. Therefore these signals were  
49 viewed mostly as attempts at manipulation by the signaler instead of carrying information  
50 regarding future behavior (Dawkins and Krebs, 1978). More recently, however, a multitude of  
51 studies have shown that signals of aggressive intent can honestly predict a subsequent escalation  
52 such as an attack in many species (e.g. Akçay et al., 2013; Bachmann et al., 2017; Laidre, 2009;  
53 Searcy et al., 2006; Waas, 1991). Often, the mechanism that ensures the honesty of these signals  
54 seem to be the subsequent risk of retaliation from receivers (Anderson et al., 2013; Anderson et  
55 al., 2012; Bachmann et al., 2017; Molles and Vehrencamp, 2001).

56           An implicit assumption in the studies of honest signaling has been that the signaling  
57 systems are at an evolutionary equilibrium such that signaling strategies persist over non-  
58 signaling strategies (Searcy and Nowicki, 2005) . Changes in physical and social ecology  
59 however, may disrupt this equilibrium. One such change that animal populations currently  
60 experience is human-induced environmental change, in particular urbanization (Johnson and  
61 Munshi-South, 2017). Although there are a plethora of studies on the effect of urbanization on  
62 signal features, particularly with respect to acoustic noise and song (Brumm and Slabbekoorn,  
63 2005; Derryberry et al., 2016; Gil and Brumm, 2014; Halfwerk and Slabbekoorn, 2009; Patricelli  
64 and Blickley, 2006; Wood and Yezerinac, 2006) how the overall honesty of signaling systems  
65 change is less well studied, particularly in aggressive signaling.

66           Several studies showed that birds living in urban and rural habitats exhibit significant  
67 differences in responses to simulated territorial intrusions, with urban birds responding more  
68 strongly to simulated territory intrusions than rural birds (Davies and Sewall, 2016; Evans et al.,  
69 2010; Fokidis et al., 2011; Foltz et al., 2015; Hardman and Dalesman, 2018). However, these  
70 studies did not determine if aggressive signals also differed in their honesty between habitats. It  
71 is worth noting that although honest aggressive signals are correlated with other aggressive  
72 behaviours like approaching and attacking an opponent, these signals (unlike approach and  
73 attack) have no physical function in the aggressive interaction other than the information they  
74 carry (Otte, 1974). Thus, aggressive signals and non-signaling aggressive behaviours constitute  
75 separate behavioural characters and may respond differently to changes associated with  
76 urbanization (Akçay et al., 2015b; see Araya-Ajoy and Dingemanse, 2014 for a discussion of  
77 behavioral characters). To our knowledge no previous study assessed the honesty of aggressive  
78 signals in urban and rural habitats.

79           Here we ask whether the honesty of multi-modal signals of aggressive intent differs  
80 between urban and rural male song sparrows, *Melospiza melodia*, a songbird common in North  
81 America and found abundantly in urban and rural habitats. Urban song sparrows have been  
82 found to exhibit higher levels of aggression than their rural counterparts in several studies  
83 (Davies and Sewall, 2016; Evans et al., 2010; Foltz et al., 2015). Song sparrows have a well-  
84 studied aggressive signaling system that consists of two close-range aggressive signals: low  
85 amplitude “soft” songs and wing waves (rapid fluttering of one or both wings without getting  
86 airborne) both of which predict a subsequent attack (Akçay et al., 2013; Nice, 1943; Searcy et  
87 al., 2014; Searcy et al., 2006). Loud (broadcast) songs however, do not reliably predict attack in  
88 this species (Searcy et al., 2014). This difference in honesty between soft songs and loud songs  
89 seems to hold for several other species: where soft vocalizations reliably predict attack (Akçay et  
90 al., 2015a), but loud vocalizations do not (Searcy and Beecher, 2009).

91           Soft songs and wing waves present an interesting potential case of how multi-modal  
92 signaling changes in urban habitats (Halfwerk and Slabbekoorn, 2015). The defining feature of  
93 these signals is the low amplitude compared to the loud broadcast songs which may be an  
94 adaptation to reduce transmission distances. In some species, soft song also differs in acoustic  
95 structure from broadcast songs (Dabelsteen et al., 1998; Vargas-Castro et al., 2017) although  
96 whether these differences are adaptations to decrease transmission distances further is currently  
97 unclear (Akçay and Beecher, 2012; Vargas-Castro et al., 2017). The low amplitude of the signal  
98 along with potential acoustic adaptation to decrease transmission distances would make soft  
99 songs less effective compared to louder signals due to the masking effect of high anthropogenic  
100 noise levels commonly found in urban habitats (Pohl et al., 2009). In the case of song sparrows  
101 in particular, Wood and Yezerinac (2006) found that most of the acoustic noise in urban habitats

102 was present at 1-4 kHz range and that urban song sparrows living in noisy habitats put relatively  
103 less energy into this frequency range of their songs when singing loud songs. Soft song differs  
104 from loud song in song sparrows in that it has a lower minimum frequency (1500 to 1700 Hz for  
105 soft songs vs. ca. 2000 for loud songs, Anderson et al., 2008). Furthermore, in rural habitats birds  
106 tend to put relatively more energy into the lower frequencies of soft song which overlap with  
107 urban noise (Anderson et al., 2008). Thus, soft song may be particularly prone to interference  
108 from urban noise.

109         One solution to the presence of urban noise is to sing loudly. Indeed, animals often  
110 respond to noise by vocalizing at higher amplitudes in response to higher noise levels, which is  
111 termed the Lombard effect (Brumm, 2004; Brumm and Todt, 2002; Brumm and Zollinger, 2011;  
112 Cynx et al., 1998). The Lombard effect is particularly strong if noise overlaps the frequency  
113 range of the vocalizations (Brumm and Todt, 2002; Manabe et al., 1998). If song sparrows show  
114 a Lombard effect in urban areas, they may sing loud songs instead of soft songs to signal their  
115 aggressive intent. Under this prediction we expect more loud songs in the urban habitats  
116 compared to rural habitats particularly by those birds who end up attacking their opponent.

117         Another solution for the problem introduced by noise would be to close the distance to  
118 their opponent (the intended recipient of low amplitude vocalizations) in order to ensure  
119 transmission of low amplitude signals in the urban habitats (Halfwerk et al., 2012). There is  
120 evidence that birds are sensitive to the relationship between amplitude and distance to the  
121 receiver (Brumm and Slater, 2006b). Getting closer to the receiver during an aggressive  
122 interaction may come at a cost however, as the proximity to the receiver potentially increases the  
123 risk of retaliation (Anderson et al., 2012; Templeton et al., 2012).

124           A further strategy to ensure transmission of soft songs would be to increase repetition rate  
125 or serial redundancy (Brumm and Slater, 2006a). Under this strategy we expect the rate of soft  
126 songs to increase in urban habitats, while rates of loud songs should not change given the latter  
127 do not reliably signal aggression. These strategies (increasing the amplitude of soft songs,  
128 decreasing distance and increasing serial redundancy) are not mutually-exclusive strategies,  
129 however they would affect the overall honesty of the signal, measured as a statistical association  
130 between the signal and subsequent attack in different ways. If urban song sparrows increase the  
131 amplitude of their aggressive songs we expect that they would sing more loud songs compared to  
132 rural song sparrows, and attackers would give significantly more loud songs, making loud songs  
133 the more honest signal. If song sparrows decrease the distance to the mount while singing soft  
134 songs we expect the distance while singing softly will be lower in urban than rural habitats while  
135 distance while singing loud songs would not differ between urban and rural habitats. The latter  
136 prediction assumes that the intended audience of the loud songs is not the immediate intruder but  
137 other neighbors, since loud songs do not reliably predict attack on the immediate intruder.  
138 Finally, if song sparrows increase the repetition rates for soft songs in urban habitat, we expect  
139 birds will sing more soft songs in urban habitats, and this difference will be particularly  
140 pronounced for attackers.

141           Given that song sparrows also have a visual signal of aggression, wing waves, that is  
142 positively correlated with soft songs, urban song sparrows may also shift their signaling effort to  
143 the visual modality (Halfwerk and Slabbekoorn, 2015). Only a few studies have examined  
144 whether acoustic noise drives such a multi-modal shift to visual signals and evidence for this  
145 remains absent in birds (Grafe et al., 2012; Partan, 2017; Patricelli and Blickley, 2006; Ríos-  
146 Chelén et al., 2015). If urban song sparrows indeed switch to the visual modality, we might

147 expect that they would give more wing waves and fewer soft songs. Previous studies in song  
148 sparrows reported strong positive correlations between the wing waves and soft songs (Akçay et  
149 al., 2014; Nice, 1943; Searcy et al., 2006). We therefore predicted that if urban birds increase  
150 their use of wing waves while decreasing their use of soft songs, the correlation between wing  
151 waves and soft songs should be absent or weaker in the urban birds compared to rural birds.

## 152 **Methods**

### 153 Study site and Subjects

154 We studied song sparrows in Montgomery County, VA at 2 urban and 3 rural sites. The  
155 two urban sites were the campuses of Virginia Tech (Blacksburg, VA) and Radford University  
156 (Radford, VA). The three rural sites were Heritage Park (just outside Blacksburg, VA), Kentland  
157 Farms of Virginia Tech and Stroubles Creek Stream Restoration area. These sites differ  
158 significantly in their urbanization based on quantitative measures of vegetation, paved surfaces,  
159 and buildings (Davies et al., 2018). Trials were carried out between 8<sup>th</sup> April and 13<sup>th</sup> May 2017.  
160 Most subjects tested were unbanded at the time of the trial but were captured after the simulated  
161 territory intrusion for banding and blood sampling for a different study. We tested 42 rural birds  
162 and 36 urban birds.

### 163 Noise Measurements

164 We measured the ambient noise levels at a randomly selected subset of the territories in  
165 experiment (12 urban and 16 rural territories) during morning hours (0600 to 1200 hrs) using a  
166 sound meter (Radioshack Digital Sound Level Meter model 33-2055) in setting A and fast  
167 response (125 ms) following the methods described in Brumm (2004). The A setting has a flat  
168 response within 1 to 8 kHz which covers most of song sparrow song range. To take the



169 measurements we pointed a sound meter, oriented horizontally, in one of the cardinal directions,  
170 picked randomly. We noted the maximum sound level measurement in a 10 second period and  
171 then rotated the sound meter clock-wise by 90 degrees and repeated the measurement. We took 2  
172 measurements per cardinal direction and then averaged the eight values. Although this method  
173 does not quantify noise in specific frequency ranges, it has been shown that noise measured in  
174 this way is functionally relevant to singing behaviors in several species (e.g. Brumm and Slater,  
175 2006a).

#### 176 Song stimuli

177 We recorded songs from male song sparrows around Blacksburg and Radford for making  
178 stimuli using a Marantz PMD 660 or PMD 661 Solid State recorder and a Sennheiser ME66/K6  
179 directional microphone. From these recordings we chose the song types that had a high signal to  
180 noise ratio from the recordings. We used 38 song types from 24 different males during the  
181 experiment. The majority of the stimuli (24 out of 38) came from males holding territories in  
182 residential areas and parks in Blacksburg as well as the edge of campus where the habitat grades  
183 into fields. Two songs came from rural sites, and the rest came from Radford University and  
184 Virginia Tech Campuses. The stimuli for each subject came from a male that was at least 1 km  
185 away (in most cases more than 5 km) from that subject, thus representing an unfamiliar song. We  
186 never used a song recorded from the same site as a stimulus during a behavioral trial.

#### 187 Aggression assays

188 We carried out the simulated territory intrusions at a location that was estimated to be a  
189 central location in the male's territory based on observation of singing perches. We placed a  
190 speaker (VictSing model C6 connected to a smartphone via Bluetooth) and a taxidermic model

191 of a song sparrow on a natural perch that was initially covered by a cloth. We adjusted speaker  
192 volume to be approximately 80 dB SPL, measured at 1m (with the same sound meter and  
193 settings as above), which corresponds to loud song volume in song sparrows. Two observers  
194 standing about 20m from the speaker narrated the trial with the same recording equipment.

195 After setting up the equipment, we started to play a song at a rate of one song every ten  
196 seconds with the taxidermic model covered. Song sparrow songs last an average of 3 seconds  
197 and we presented stimuli at a rate of one song per 10 seconds for the duration of the trial which  
198 approximates typical song sparrow singing rate. Each male received only a single rendition of  
199 one song type during the trial repeated every 10 seconds. This is consistent with the fact that  
200 song sparrows repeat a single song type for several minutes during their natural singing (eventual  
201 variety singing), and does not lead to any habituation at even longer durations than used in this  
202 experiment (Akçay et al., 2013). We recorded behaviours for three minutes after the first  
203 response of the focal male (the pre-mount period). After the pre-mount period, we paused the  
204 playback and one experimenter removed the cover to reveal the taxidermic model. We then  
205 restarted the playback at the same song rate as before and continued for another 10 minutes or  
206 until the subject attacked, physically touched the mount, at which point we stopped the playback  
207 and retrieved the mount before it was destroyed (the mount period).

## 208 Response Measures

209 During the trial, the observer narrating the trial noted attacks and the following  
210 behaviours: flights (with distance to the speaker after each flight), soft songs, loud songs and  
211 wing waves (all divided by trial duration and reported as rates). Soft and loud song determination  
212 was made in the field by experienced observers (CA or MLB). Song amplitude in song sparrows  
213 varies continuously between 55 dB to 85 dB, and our determination of soft vs. loud song reduces

214 this continuous variation into a categorical decision. This method has been validated by  
215 Anderson et al. (2008) who showed that an expert observer produces a clear cut-off point with  
216 soft vs. loud determinations made in the field when these are validated with actual amplitude  
217 measurements from a fixed distance. Several studies using soft song categorization in this way in  
218 this species found that it reliably predicts attack whereas loud songs do not (Akçay et al., 2015a).  
219 Thus, this categorization captures biologically meaningful variation in amplitude.

220         The trial recordings were scanned with the software Syrinx (John Burt, Portland, OR).  
221 From the trial recordings we extracted the counts of flights, loud songs, soft songs and wing  
222 waves and proportion of time spent within 1m for both the initial pre-mount period and the  
223 mount period. Additionally, we noted the closest approach distance for the pre-mount period. We  
224 did not use closest approach for the mount period as a response variable because there was little  
225 variation in that measure for the mount period (an overwhelming majority of the subjects  
226 approached to within 1m). Flights, proportion of time spent within 1 m of the speaker, closest  
227 approach (pre-mount period) are considered aggressive behaviours, whereas the loud songs, soft  
228 songs and wing waves are considered signaling behaviours (Akçay et al., 2015b). Finally, we  
229 also extracted from the recordings the distance at which each loud and soft song were delivered  
230 (as noted above, distance information was given with each flight during the trial).

### 231         Data analyses

232         Our first analysis addressed whether there were any differences between aggressive  
233 behaviours and signaling behaviours of rural and urban birds. We used Mann-Whitney U tests  
234 for all aggressive behaviors and signaling behaviours as these were non-normally distributed. We  
235 report effect sizes (Hedges'  $g$ , computed with the R package "effsize"; Torchiano, 2018) and

236 confidence intervals for the urban-rural comparisons in all of the response variables. We carried  
237 out a Chi-square test to determine whether attack rates differed between urban and rural birds.

238 To address our main question of whether honesty of signaling differs between urban and  
239 rural habitats, we carried out separate logistic regressions with attack as the dependent variable  
240 (attack or non-attack) and the following as the predictor variables: habitat and signal (soft songs,  
241 wing waves or loud songs), and the interaction between habitat and the signal. The main effects  
242 and interaction effects were entered sequentially, representing 2 contrasts we were interested in:  
243 1) Does a signal (soft song, loud song or wing waves) predict attack after taking into account the  
244 effect of habitat and 2) Is there an interaction between habitat and signal in predicting attack? We  
245 also compared the proportion of soft songs among all songs of attackers and non-attackers in a  
246 similar logistic regression model. In supplementary materials (Tables S3-S6) we also report  
247 parallel analyses with general linear mixed models in which used the same fixed effects but also  
248 added site as a random factor. These results closely parallel the models reported in the main text  
249 but the models showed singular fits. We therefore report the models without the site as a random  
250 factor below.

251 To determine whether urban soft songs were given at a shorter distance from the  
252 speaker/mount we determined for each subject the average distance at which soft songs and loud  
253 songs were given, separately for both the pre-mount and mount periods. We then carried out a  
254 linear mixed model with habitat, type of song (soft vs. loud) and their interaction as fixed  
255 variables and subject as the random variable.

256 Finally, we asked whether there was a multi-modal shift from soft songs to wing waves in  
257 urban areas. Soft songs and wing waves are highly correlated with each other (Akçay et al.,  
258 2014). Thus, we need to control for the level of overall signaling effort to determine whether

259 wing waves were more common in urban areas. In order to do that, we first added together all  
260 aggressive signals (counts of wing waves and soft songs) and then took the proportion of wing  
261 waves among the total number of aggressive signals for subjects who gave at least one soft song  
262 or wing wave. We then compared the proportion of wing waves between the habitats with a  
263 Mann-Whitney U test.

## 264 **Results**

265 Ambient noise levels were significantly higher by approximately 8 decibels in the urban  
266 territories ( $M \pm SD$ :  $71.22 \pm 3.11$  dB;  $n=12$ ) than the rural territories ( $M \pm SD$ :  $64.37 \pm 5.54$  dB,  $n=16$ ;  
267 independent samples t-test:  $t_{26}=3.84$ ,  $p=0.0007$ ). The noise levels at urban habitats correspond to  
268 the higher end of noise measurements reported in a study that documented effects of urban noise  
269 on the acoustic properties of song sparrow song (Wood and Yezerinac, 2006). Urban birds were  
270 significantly more aggressive than rural birds in all of the aggressive behaviors except rate of  
271 flights during the mount period (Table 1 and Table 2). More urban birds (14 out of 36, 38.9%)  
272 attacked the mount than rural birds (4 out of 42, 9.5%;  $\chi^2=9.42$ ;  $p=0.002$ ).

273 During the pre-mount period, urban birds sang more soft songs and gave more wing  
274 waves than rural birds. Loud song rates did not differ significantly between urban and rural birds  
275 during the pre-mount period (Table 1). During the mount period, urban birds sang more soft  
276 songs and gave more wing waves than rural birds. Loud song rates did not differ significantly  
277 between urban and rural birds during the mount period (Table 2).

278 Logistic regression models on attacks as the response variable showed that the main  
279 effect of habitat and each of soft song (Figure 2a), wing wave (Figure 2b) and loud song (Figure  
280 2c) was significant (Table 3): Birds that sang high rates of soft songs, gave high rates of wing

281 waves and were more likely to attack. Interestingly, birds that sang fewer loud songs were also  
282 more likely to attack. Consequently, the proportion of soft songs was also a highly significant  
283 predictor of attack: birds that sang a higher proportion of soft songs were more likely to attack  
284 (Figure 2d, Table 3). The two-way interaction between the signal and habitat was not significant  
285 in any of the models, suggesting the honesty of signaling did not differ between urban and rural  
286 habitats

287 In general, soft songs were sung closer to the speaker than loud songs for both urban and  
288 rural birds. Furthermore, urban birds sang both soft and loud songs closer to the speaker than  
289 rural birds (Table 4, Figure 3). The linear mixed model on song distances for loud and soft songs  
290 showed a significant effect of habitat and song category (soft songs were sung in closer  
291 proximity to the speaker) but no interaction effect between habitat and song category (Table 5).

292 During the pre-mount period, there was a non-significant trend for urban birds to give  
293 proportionally more wing waves than rural birds (0.43 vs. 0.30 for urban vs. rural subjects)  
294 ( $U=348.5$ ,  $p=0.074$ ,  $n= 62$ , Hedges'  $g= 0.39$ ; 95% CI: -0.12- 0.91). During the mount period,  
295 urban birds also gave proportionally more wing waves than rural birds (0.32 vs. 0.19), and the  
296 difference was significant ( $U= 302.5$ ,  $p=0.043$ ,  $n= 59$ , Hedges'  $g= 0.49$ ; 95% CI: -0.03-1.02;  
297 Figure 4).

## 298 Discussion

299 We aimed to test the hypothesis that low amplitude songs in urban song sparrows may be  
300 a less honest signal of aggression than loud songs due to anthropogenic noise in urban habitats.  
301 Contrary to this prediction, soft songs were predictive of a physical attack in urban and rural  
302 habitats alike and song sparrows in urban habitats sang more soft songs than rural birds,

303 consistent with the fact that they were also more aggressive than rural birds. Wing waves also  
304 showed the same pattern: urban birds gave more wing waves, again consistent with the fact they  
305 were more aggressive than rural birds. Wing waves also reliably predicted attack in both habitats.  
306 Interestingly, the most honest signal of attack in both habitats was low rates of loud songs:  
307 attackers sang fewer loud songs per minute than non-attackers. We found that urban birds  
308 generally sang at a shorter distance from the speaker for both loud and soft songs, and soft songs  
309 were given at a closer distance than loud songs in both habitat types. Finally, we found that  
310 during the mount period urban birds gave proportionally more wing waves as part of their total  
311 signaling effort. To our knowledge, this is the first study to examine honest multi-modal  
312 signaling in aggressive interactions in relation to urbanization and adds to the growing literature  
313 on behavioral effects of urbanization on animal social behavior. Below we discuss these results  
314 in the context of previous research on signal honesty in this and other songbirds.

315 *Song sparrows sing softly and closely in the city*

316 Even under the noisy conditions of the urban habitats, male song sparrows seemed to use  
317 soft songs as an honest signal of aggressive intent. Given the low amplitude of soft song (relative  
318 to loud song), it would be reasonable to suppose that soft song will be less effective in urban  
319 habitats as an aggressive signal. The present results do not support this hypothesis. Instead, urban  
320 birds sang more soft songs than rural males. Increasing the rate of repetition and therefore the  
321 serial redundancy (Brumm and Slater, 2006a) may be a strategy to ensure the reception of the  
322 signal under noise, although it is worth noting that the rate of wing waves also increased in urban  
323 habitats compared to rural habitats. Given that wing waves, a visual signal, are not masked by  
324 acoustic noise this finding suggests that the increase in soft song rates in urban habitats may be  
325 due to the increased aggression levels of song sparrows.

326 A potential strategy that song sparrows might engage in to deal with urban noise is to  
327 close the distance to the receiver (Halfwerk et al., 2012) such that the signal-to-noise ratio of the  
328 acoustic signals would be improved at the receiver end of the transmission. Indeed, we found  
329 that urban birds sang at shorter distances to the speaker (the presumed receiver of the signals) for  
330 both loud songs and soft songs compared to rural birds. Approaching closer to the speaker would  
331 also mean that the playback songs, which were played at the same amplitude in urban and rural  
332 habitats, would also not suffer from decreased signal to noise ratios in urban habitats compared  
333 to rural habitats at the point of the reception.

334 The clearest example of such a spatial strategy in comes from an elegant experiment by  
335 Halfwerk and colleagues (2012). In this experiment, male great tits (*Parus major*) singing to  
336 their mates adjusted their singing locations to be closer to the nest box when they experimentally  
337 presented noise inside the nest box when their mates was in the nest box. Remarkably, the males  
338 did not experience the noise themselves (as the noise was only presented in the nest box and was  
339 not audible outside) but evidently acquired the information about the noise socially from their  
340 mates. In another recent study, male white-crowned sparrows living in noisier territories  
341 approached the speaker closer than the males in the same population that lived in quieter  
342 territories. (Phillips and Derryberry, 2018). One interpretation of this finding is that high levels  
343 of ambient noise might require birds to approach each other closer to evaluate and transmit  
344 signals efficiently. A similar logic may apply to song sparrows in our urban habitats as well.  
345 Unlike the Halfwerk et al. study, however, neither the current study nor Phillips and Derryberry  
346 (2018) experimentally manipulated noise levels to allow a causal inference about the role of  
347 noise in determining proximity in aggressive interactions. Interestingly, in another experimental  
348 study, European robins (*Erithacus rubecula*) were found to move away from a source of noise as



349 the volume of the noise increased, although the noise presentation in that case was not  
350 simultaneously accompanied with song stimulus (McLaughlin and Kunc, 2013). Therefore, the  
351 males did not have a reason to stay in close proximity to the source of noise.

352 *Multimodal signaling in urban habitats*

353 Although urban noise did not decrease the use or honesty of song songs we found  
354 tentative evidence for a multi-modal shift: urban birds tended to give more wing waves  
355 proportionally to their total aggressive signaling effort at least during the mount period although  
356 the effect size was moderate and the confidence intervals were large. This finding, if confirmed,  
357 is consistent with the hypothesis that acoustic noise found in urban habitats may lead to  
358 switching signaling effort to the visual modality (Partan, 2017; Partan et al., 2010). It is also  
359 important to note that if a multi-modal shift is occurring in urban song sparrows it is incomplete:  
360 the urban birds still sing more soft songs than rural birds and soft song is still an honest signal of  
361 aggressive intent in urban birds.

362 Whether wing waves are a more effective signal compared to soft songs in urban habitats  
363 (compared to rural habitats) is an open question. To determine the relative effectiveness of these  
364 signals an experiment displaying the visual (wing wave) and acoustic (soft song) signal  
365 separately and together with a robotic model would be required (Anderson et al., 2013; Partan et  
366 al., 2010; Partan et al., 2009). To the best of our knowledge only one experiment compared  
367 responses to signals in different modalities in urban and rural habitats. In this study, Partan and  
368 her colleagues (2010) found that urban gray squirrels (*Sciurus carolinensis*) responded more to  
369 the visual alarm signal (tail flagging) displayed by a robotic squirrel than the rural squirrels.  
370 There was however no significant difference in response strength to the vocal signals between  
371 urban and rural squirrels. These results suggest that urban gray squirrels may rely more on the

372 visual signals in urban habitats even if vocal signals are still as effective in urban habitats as in  
373 rural habitats.

374 In another relevant study Ríos-Chelén and colleagues examined whether red-winged  
375 blackbirds changed their signaling effort from acoustic to visual signals (the “song-spread  
376 display”, in which singing males spread their wings to expose their red epaulets) in noisier  
377 habitats (Ríos-Chelén et al., 2015). They found no effect of the ambient noise on the intensity of  
378 visual displays although males in the noisier habitats did change some features of their  
379 vocalizations.

380 How animals deal with noise in multiple modalities has been examined in relatively few  
381 studies, although it is increasingly becoming a focus of attention (Brumm and Slabbekoorn,  
382 2005; Halfwerk and Slabbekoorn, 2015). We believe the aggressive signaling system of song  
383 sparrows (and related species like swamp sparrows; Anderson et al., 2013; Ballentine et al.,  
384 2008) provides an excellent model system to address how noise affects multi-modal signaling.  
385 As noted, wing waves and soft songs are highly correlated with each other and are therefore  
386 likely to be redundant, although noisy conditions in one modality may change the perception of  
387 these signals (Halfwerk and Slabbekoorn, 2015). Furthermore, the low amplitude of soft songs  
388 make it particularly likely to be prone to interference which may call for not only multi-modal  
389 shifts but also an increase in redundancy in signaling (e.g. a tighter correlation between wing  
390 waves and soft songs). These possibilities can be examined with experimental manipulations of  
391 ambient noise and multimodal signaling.

392 In summary, we found that urban song sparrows use soft songs as an honest signal,  
393 despite the expectation that urban noise may make it a less effective signal. Given the scarcity of  
394 studies on the honesty of acoustic signaling in urban habitats (despite a plethora of studies on

395 how anthropogenic noise affects signal feature), it is still an open question whether urbanization  
396 in general alters honesty of communication systems found in less disturbed habitats. We also  
397 found that urbanization may affect multi-modal displays by inducing some males to switch to a  
398 visual display (wing waves) instead of soft songs. We believe that the song sparrow signaling  
399 system is an excellent model to ask how multi-modal signaling evolves under anthropogenic  
400 habitat change.

401 **References**

- 402 Akçay Ç, Anderson RC, Nowicki S, Beecher MD, Searcy WA, 2015a. Quiet threats: soft song as  
403 an aggressive signal in birds. *Anim Behav* 105:267-274.
- 404 Akçay Ç, Beecher MD, 2012. Signalling while fighting: further comments on soft song. *Anim*  
405 *Behav* 83:e1-e3.
- 406 Akçay Ç, Campbell SE, Beecher MD, 2014. Individual differences affect honest signaling in a  
407 songbird. *Proc R Soc Lond, Ser B: Biol Sci* 281:20132496.
- 408 Akçay Ç, Campbell SE, Beecher MD, 2015b. The fitness consequences of honesty: under-  
409 signalers have a survival advantage in song sparrows. *Evolution* 69:3186-3193.
- 410 Akçay Ç, Tom ME, Campbell SE, Beecher MD, 2013. Song type matching is an honest early  
411 threat signal in a hierarchical animal communication system. *Proc R Soc Lond, Ser B:*  
412 *Biol Sci* 280:20122517. doi: <http://dx.doi.org/10.1098/rspb.2012.2517>.
- 413 Anderson RC, DuBois A, Piech D, Searcy W, Nowicki S, 2013. Male response to an aggressive  
414 visual signal, the wing wave display, in swamp sparrows. *Behav Ecol Sociobiol* 67:593-  
415 600.
- 416 Anderson RC, Searcy WA, Hughes M, Nowicki S, 2012. The receiver-dependent cost of soft  
417 song: a signal of aggressive intent in songbirds. *Anim Behav* 83:1443-1448.
- 418 Anderson RC, Searcy WA, Peters S, Nowicki S, 2008. Soft song in song sparrows: Acoustic  
419 structure and implications for signal function. *Ethology* 114:662-676.
- 420 Araya-Ajoy YG, Dingemanse NJ, 2014. Characterizing behavioural ‘characters’: an evolutionary  
421 framework. *Proc R Soc Lond, Ser B: Biol Sci* 281:20132645.
- 422 Bachmann JC, Cortesi F, Hall MD, Marshall NJ, Salzburger W, Gante HF, 2017. Real-time  
423 social selection maintains honesty of a dynamic visual signal in cooperative fish.  
424 *Evolution Letters* 1:269-278. doi: 10.1002/evl3.24.
- 425 Ballentine B, Searcy WA, Nowicki S, 2008. Reliable aggressive signalling in swamp sparrows.  
426 *Anim Behav* 75:693-703.
- 427 Brumm H, 2004. The impact of environmental noise on song amplitude in a territorial bird. *J*  
428 *Anim Ecol* 73:434-440. doi: doi:10.1111/j.0021-8790.2004.00814.x.
- 429 Brumm H, Slabbekoorn H, 2005. Acoustic communication in noise. *Advances in the Study of*  
430 *Behavior* 35:151-209.

- 431 Brumm H, Slater P, 2006a. Ambient noise, motor fatigue, and serial redundancy in chaffinch  
432 song. *Behav Ecol Sociobiol* 60:475-481.
- 433 Brumm H, Slater P, 2006b. Animals can vary signal amplitude with receiver distance: evidence  
434 from zebra finch song. *Anim Behav* 72:699-705.
- 435 Brumm H, Todt D, 2002. Noise-dependent song amplitude regulation in a territorial songbird.  
436 *Anim Behav* 63:891-897.
- 437 Brumm H, Zollinger SA, 2011. The evolution of the Lombard effect: 100 years of  
438 psychoacoustic research. *Behaviour* 148:1173-1198.
- 439 Caryl PG, 1979. Communication by agonistic displays: what can game theory contribute to  
440 ethology? *Behaviour* 68:136-169.
- 441 Cynx J, Lewis R, Tavel B, Tse H, 1998. Amplitude regulation of vocalizations in noise by a  
442 songbird, *Taeniopygia guttata*. *Anim Behav* 56:107-113.
- 443 Dabelsteen T, McGregor PK, Lampe HM, Langmore NE, Holland J, 1998. Quiet song in birds:  
444 an overlooked phenomenon. *Bioacoustics* 9:80-105.
- 445 Davies S, Beck ML, Sewall KB, 2018. Territorial aggression in urban and rural Song Sparrows  
446 is correlated with corticosterone, but not testosterone. *Horm Behav* 98:8-15.
- 447 Davies S, Sewall KB, 2016. Agonistic urban birds: elevated territorial aggression of urban song  
448 sparrows is individually consistent within a breeding period. *Biol Lett* 12:20160315.
- 449 Dawkins R, Krebs JR, 1978. Animal Signals: information or manipulation? In: Krebs JR, Davies  
450 NB, editors. *Behav Ecol Oxford: Blackwell*. p. 282-309.
- 451 Derryberry EP, Danner RM, Danner JE, Derryberry GE, Phillips JN, Lipshutz SE, Gentry K,  
452 Luther DA, 2016. Patterns of Song across Natural and Anthropogenic Soundscapes  
453 Suggest That White-Crowned Sparrows Minimize Acoustic Masking and Maximize  
454 Signal Content. *PLOS ONE* 11:e0154456. doi: 10.1371/journal.pone.0154456.
- 455 Evans J, Boudreau K, Hyman J, 2010. Behavioural Syndromes in Urban and Rural Populations  
456 of Song Sparrows. *Ethology* 116:588-595. doi: 10.1111/j.1439-0310.2010.01771.x.
- 457 Fokidis HB, Orchinik M, Deviche P, 2011. Context-specific territorial behavior in urban birds:  
458 no evidence for involvement of testosterone or corticosterone. *Horm Behav* 59:133-143.
- 459 Foltz SL, Ross AE, Laing BT, Rock RP, Battle KE, Moore IT, 2015. Get off my lawn: increased  
460 aggression in urban song sparrows is related to resource availability. *Behav Ecol*  
461 26:1548-1557.

- 462 Gil D, Brumm H, 2014. Acoustic communication in the urban environment: patterns,  
463 mechanisms, and potential consequences of avian song adjustments. In: Gil D, Brumm H,  
464 editors. *Avian Urban Ecology Oxford*: Oxford University Press.
- 465 Grafe TU, Preininger D, Sztatecsny M, Kasah R, Dehling JM, Proksch S, Hödl W, 2012.  
466 Multimodal communication in a noisy environment: a case study of the Bornean rock  
467 frog *Staurois parvus*. *PLoS One* 7:e37965.
- 468 Halfwerk W, Bot S, Slabbekoorn H, 2012. Male great tit song perch selection in response to  
469 noise-dependent female feedback. *Funct Ecol* 26:1339-1347.
- 470 Halfwerk W, Slabbekoorn H, 2009. A behavioural mechanism explaining noise-dependent  
471 frequency use in urban birdsong. *Anim Behav* 78:1301-1307.
- 472 Halfwerk W, Slabbekoorn H, 2015. Pollution going multimodal: the complex impact of the  
473 human-altered sensory environment on animal perception and performance. *Biol Lett*  
474 11:20141051.
- 475 Hardman SI, Dalesman S, 2018. Repeatability and degree of territorial aggression differs among  
476 urban and rural great tits (*Parus major*). *Scientific Reports* 8:5042.
- 477 Johnson MTJ, Munshi-South J, 2017. Evolution of life in urban environments. *Science* 358. doi:  
478 10.1126/science.aam8327.
- 479 Laidre ME, 2009. How often do animals lie about their intentions? An experimental test. *Am Nat*  
480 173:337-346.
- 481 Manabe K, Sadr EI, Dooling R, 1998. Control of vocal intensity in budgerigars (*Melopsittacus*  
482 *undulatus*): differential reinforcement of vocal intensity and the Lombard effect. *J Acoust*  
483 *Soc Am* 103:1190-1198.
- 484 Maynard Smith J, 1974. The theory of games and the evolution of animal conflicts. *J Theor Biol*  
485 47:209- 221.
- 486 McLaughlin KE, Kunc HP, 2013. Experimentally increased noise levels change spatial and  
487 singing behaviour. *Biol Lett* 9:20120771. doi: 10.1098/rsbl.2012.0771.
- 488 Molles LE, Vehrencamp SL, 2001. Songbird cheaters pay a retaliation cost: evidence for  
489 auditory conventional signals. *Proceedings of Royal Society of London, B* 268:2013-  
490 2019.
- 491 Nice MM, 1943. Studies in the life history of the song sparrow II. The behavior of the song  
492 sparrow and other passerines. *Transactions of the Linnean Society of New York* 6:1-328.

- 493 Otte D, 1974. Effects and functions in the evolution of signaling systems. *Annu Rev Ecol Syst*  
494 5:385-417.
- 495 Partan SR, 2017. Multimodal shifts in noise: switching channels to communicate through rapid  
496 environmental change. *Anim Behav* 124:325-337.
- 497 Partan SR, Fulmer AG, Gounard MA, Redmond JE, 2010. Multimodal alarm behavior in urban  
498 and rural gray squirrels studied by means of observation and a mechanical robot. *Current*  
499 *Zoology* 56.
- 500 Partan SR, Larco CP, Owens MJ, 2009. Wild tree squirrels respond with multisensory  
501 enhancement to conspecific robot alarm behaviour. *Anim Behav* 77:1127-1135.
- 502 Patricelli GL, Blickley JL, 2006. Avian communication in urban noise: causes and consequences  
503 of vocal adjustment. *The Auk* 123:639-649.
- 504 Phillips JN, Derryberry EP, 2018. Urban sparrows respond to a sexually selected trait with  
505 increased aggression in noise. *Scientific Reports* 8:7505. doi: 10.1038/s41598-018-  
506 25834-6.
- 507 Pohl NU, Slabbekoorn H, Klump GM, Langemann U, 2009. Effects of signal features and  
508 environmental noise on signal detection in the great tit, *Parus major*. *Anim Behav*  
509 78:1293-1300.
- 510 Ríos-Chelén AA, Lee GC, Patricelli GL, 2015. Anthropogenic noise is associated with changes  
511 in acoustic but not visual signals in red-winged blackbirds. *Behav Ecol Sociobiol*  
512 69:1139-1151.
- 513 Searcy WA, Akçay Ç, Nowicki S, Beecher MD, 2014. Aggressive Signaling in Song Sparrows  
514 and Other Songbirds. *Advances in the Study of Behavior* 46:89-125.
- 515 Searcy WA, Anderson RC, Nowicki S, 2006. Bird song as a signal of aggressive intent. *Behav*  
516 *Ecol Sociobiol* 60:234-241.
- 517 Searcy WA, Beecher MD, 2009. Song as an aggressive signal in songbirds. *Anim Behav*  
518 78:1281-1292.
- 519 Searcy WA, Nowicki S, 2005. *The evolution of animal communication*. Princeton Princeton  
520 University Press.
- 521 Templeton CN, Akçay Ç, Campbell SE, Beecher MD, 2012. Soft song is a reliable signal of  
522 aggressive intent in song sparrows. *Behav Ecol Sociobiol* 66:1503-1509.
- 523 Torchiano M, 2018. Package 'effsize'.

- 524 Vargas-Castro LE, Sandoval L, Searcy WA, 2017. Eavesdropping avoidance and sound  
525 propagation: the acoustic structure of soft song. *Anim Behav* 134:113-121. doi:  
526 <https://doi.org/10.1016/j.anbehav.2017.10.008>.
- 527 Waas JR, 1991. Do little blue penguins signal their intentions during aggressive interactions with  
528 strangers. *Anim Behav* 41:375-382.
- 529 Wood WE, Yezerinac SM, 2006. Song sparrow (*Melospiza melodia*) song varies with urban  
530 noise. *Auk* 123:650-659.
- 531 Zollinger SA, Goller F, Brumm H, 2011. Metabolic and respiratory costs of increasing song  
532 amplitude in zebra finches. *Plos One* 6:e23198.
- 533
- 534



535 Figure Legends

536 Figure 1. Mount period (a) soft song rates (b) loud song rates, (c) wing wave rates and (d)  
537 proportion of soft songs. The dots are individual data points, boxes indicate the interquartile  
538 range and medians. Whiskers are 95% confidence intervals. Rates are given per minutes.

539 Figure 2. Mount period (a) soft song rates, (b) wing wave rates, (c) loud song rates and (d)  
540 proportion of soft songs of attacking and non-attacking birds by habitat. The dots are individual  
541 data points, boxes indicate the interquartile range and medians. Whiskers are 95% confidence  
542 intervals. Rates are given per minutes.

543 Figure 3. Song distances during the pre-mount (a, b) and mount (c,d) periods. The dots are  
544 individual data points, boxes indicate the interquartile range and medians. Whiskers are 95%  
545 confidence intervals. The left panels show distances at which soft songs are sung, the right  
546 panels show distances at which loud songs are sung.

547 Figure 4. Proportion of wing waves among the sum of soft songs and wing waves for (a) pre-  
548 mount period and (b) mount period. The dots are individual data points, boxes indicate the  
549 interquartile range and medians. Whiskers are 95% confidence intervals.

550

551 Table 1. Comparison of urban and rural song sparrows in the response variables during the pre-  
552 mount period. Positive effect sizes mean higher values for urban birds.

| Variable                            | W     | p-value  | Hedges' g | 95% CI       |
|-------------------------------------|-------|----------|-----------|--------------|
| <i>Flight rate</i>                  | 500   | 0.0099   | 0.59      | 0.13 – 1.06  |
| <i>Closest approach</i>             | 1129  | 0.000002 | -0.56     | -0.10 – 1.02 |
| <i>Proportion of time within 1m</i> | 376.5 | 0.00013  | 0.95      | 0.47 – 1.42  |
| <i>Soft song rate</i>               | 397   | 0.00028  | 0.69      | 0.23 – 1.16  |
| <i>Loud song rate</i>               | 645   | 0.27     | 0.19      | -0.26 – 0.65 |
| <i>Wing wave rate</i>               | 385   | 0.000008 | 0.78      | 0.31 – 1.25  |

553

554 Table 2. Comparison of urban and rural song sparrows in the response variables during the  
555 mount period. Positive effect sizes mean higher values for urban birds.

| Variable                            | W     | p-value  | Hedges' g | 95% CI       |
|-------------------------------------|-------|----------|-----------|--------------|
| <i>Flight rate</i>                  | 624   | 0.19     | 0.39      | 0.06 – 0.86  |
| <i>Proportion of time within 1m</i> | 358.5 | 0.000007 | 0.93      | 0.45 – 1.40  |
| <i>Soft song rate</i>               | 558   | 0.046    | 0.50      | 0.04 – 0.96  |
| <i>Loud song rate</i>               | 825.5 | 0.49     | -0.06     | -0.51 – 0.39 |
| <i>Wing wave rate</i>               | 524   | 0.015    | 0.38      | -0.07 – 0.83 |

556

557 Table 3. Logistic regression models with habitat and soft songs, wing waves, loud songs or  
558 proportion of soft songs during the mount period as predictor variables. A separate model for  
559 each signal was run. The cells report  $\chi^2$  values (p-values, alpha <0.05 indicated with bold text)  
560 from a forward sequential logistic regression. Note that in all models, we entered habitat first,  
561 followed by the signal and the interaction term. We excluded six subjects that did not sing any  
562 songs (soft or loud) from the model with proportion of soft songs (rightmost column).

| Model:                | <i>Soft song model</i> | <i>Wing wave model</i> | <i>Loud song model</i>    | <i>Proportion of soft songs</i> |
|-----------------------|------------------------|------------------------|---------------------------|---------------------------------|
| <b>Habitat</b>        | 9.74 ( <b>0.002</b> )  | 9.74 ( <b>0.002</b> )  | 9.74 ( <b>0.002</b> )     | 5.18 ( <b>0.022</b> )           |
| <b>Signal</b>         | 5.13 ( <b>0.023</b> )  | 5.36 ( <b>0.020</b> )  | 17.28 ( <b>0.000003</b> ) | 13.21 ( <b>0.0003</b> )         |
| <b>Habitat*Signal</b> | 0.32 (0.57)            | 2.43 (0.12)            | 1.14 (0.28)               | 0.65 (0.42)                     |

563

564 Table 4. Means (SD) of song distances in rural and urban habitats for loud songs and soft songs  
565 in the pre-mount and mount periods.

|                   | Pre-mount   |             | Mount       |             |
|-------------------|-------------|-------------|-------------|-------------|
|                   | rural       | urban       | rural       | urban       |
| <b>loud songs</b> | 6.14 (4.16) | 3.99 (2.83) | 5.61 (3.92) | 3.71 (3.95) |
| <b>soft songs</b> | 4.40 (3.71) | 2.15 (3.06) | 1.92 (2.67) | 1.06 (2.13) |

566

567 Table 5. Linear mixed models on average distances depending on habitat (urban vs rural) and  
568 song category (soft vs loud) during the pre-mount and mount periods.

| <i>Pre-Mount period</i>       | <i>Coefficient (SE)</i> | <i>t</i> | <i>p</i>            |
|-------------------------------|-------------------------|----------|---------------------|
| <b>Intercept</b>              | 6.01 (0.59)             | 10.24    | <b>&lt;0.00001</b>  |
| <b>Habitat (urban)</b>        | -2.14 (0.85)            | -2.51    | <b>0.014</b>        |
| <b>Song category (soft)</b>   | -1.41 (0.65)            | -2.17    | <b>0.035</b>        |
| <b>Habitat* Song category</b> | -0.20 (0.90)            | -0.23    | 0.82                |
| <i>Mount Period</i>           |                         |          |                     |
| <b>Intercept</b>              | 5.48 (0.54)             | 10.05    | <b>&lt;0.00001</b>  |
| <b>Habitat (urban)</b>        | -1.88 (0.83)            | -2.27    | <b>0.026</b>        |
| <b>Song category (soft)</b>   | -3.13 (0.56)            | -5.59    | <b>&lt;0.000001</b> |
| <b>Habitat* Song category</b> | 0.78 (0.82)             | 0.96     | 0.34                |

569

570

## Honest signaling and urbanization 28

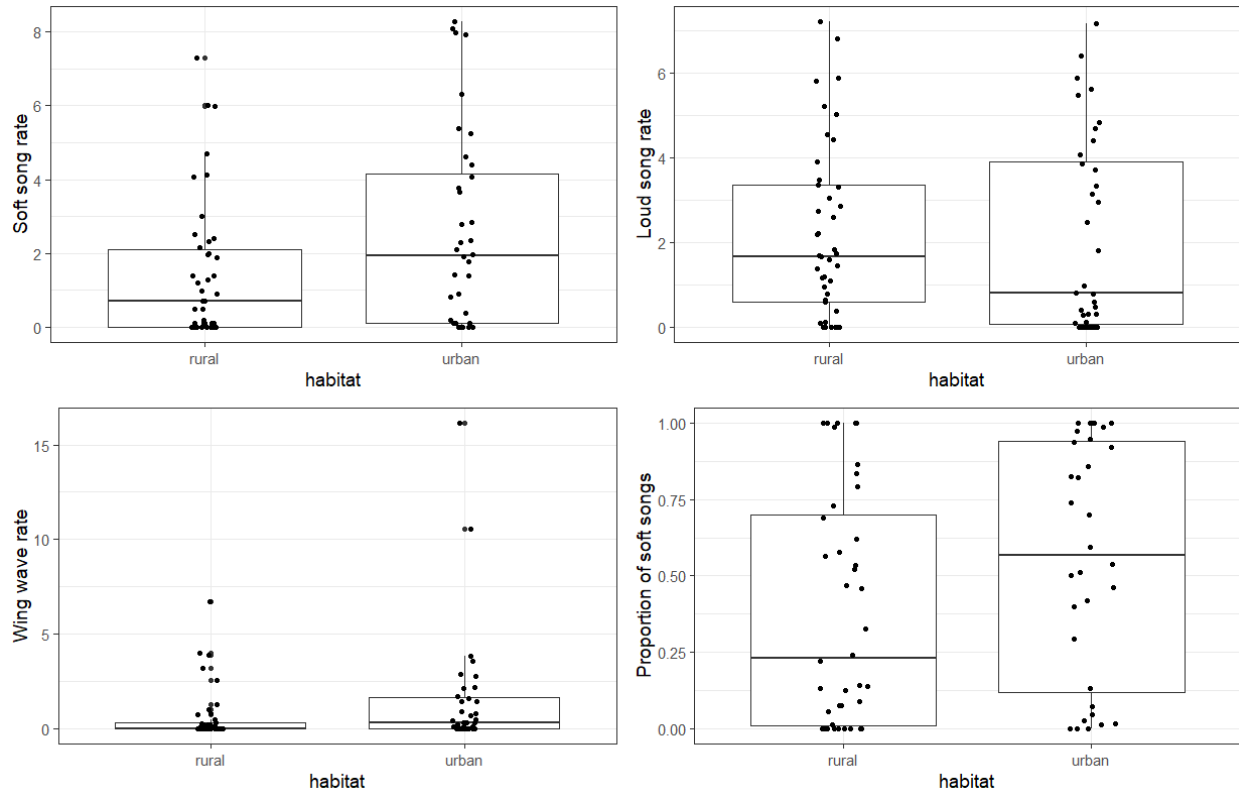

571

572 Figure 1. Mount period (a) soft song rates (b) loud song rates, (c) wing wave rates and (d)  
573 proportion of soft songs. The dots are individual data points, boxes indicate the interquartile  
574 range and medians. Whiskers are 95% confidence intervals. Rates are given per minutes.

575

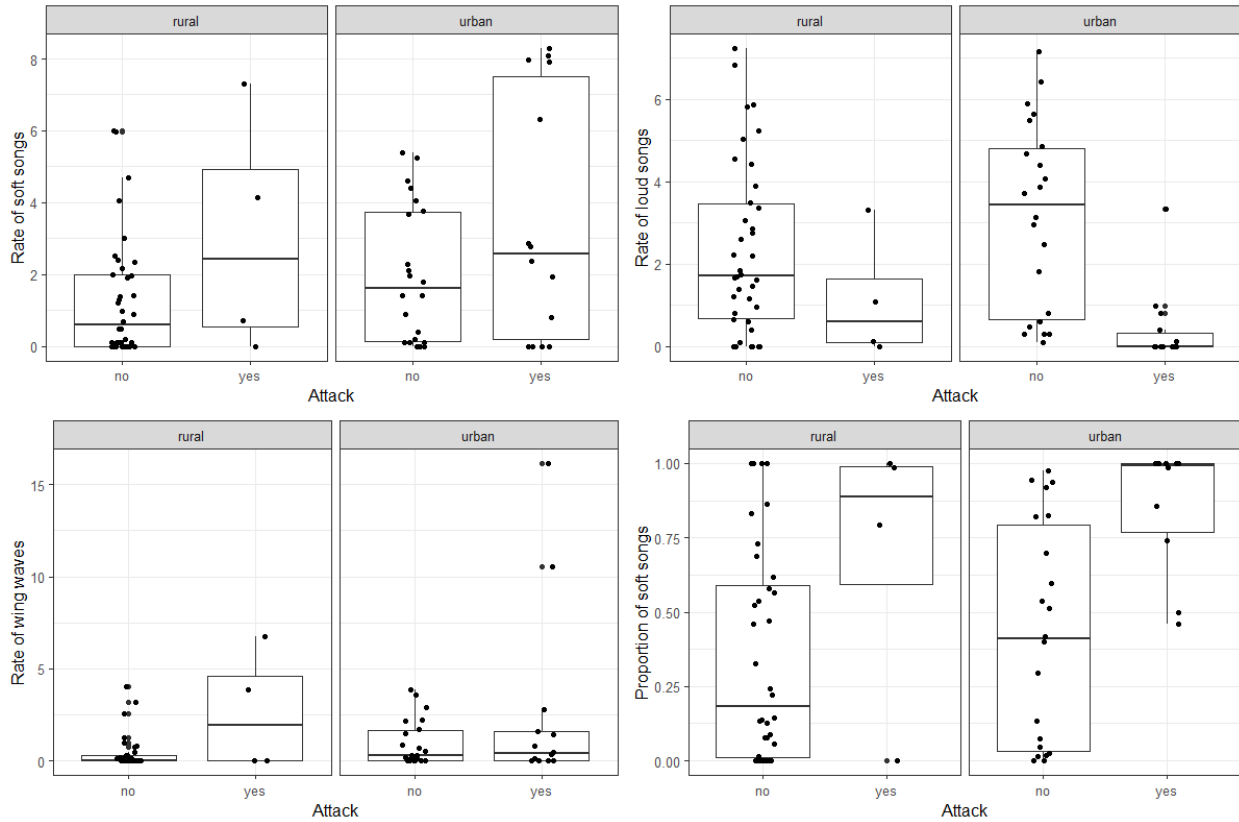

576

577 Figure 2. Mount period (a) soft song rates, (b) wing wave rates, (c) loud song rates and (d)  
578 proportion of soft songs of attacking and non-attacking birds by habitat. The dots are individual  
579 data points, boxes indicate the interquartile range and medians. Whiskers are 95% confidence  
580 intervals. Rates are given per minutes.

581

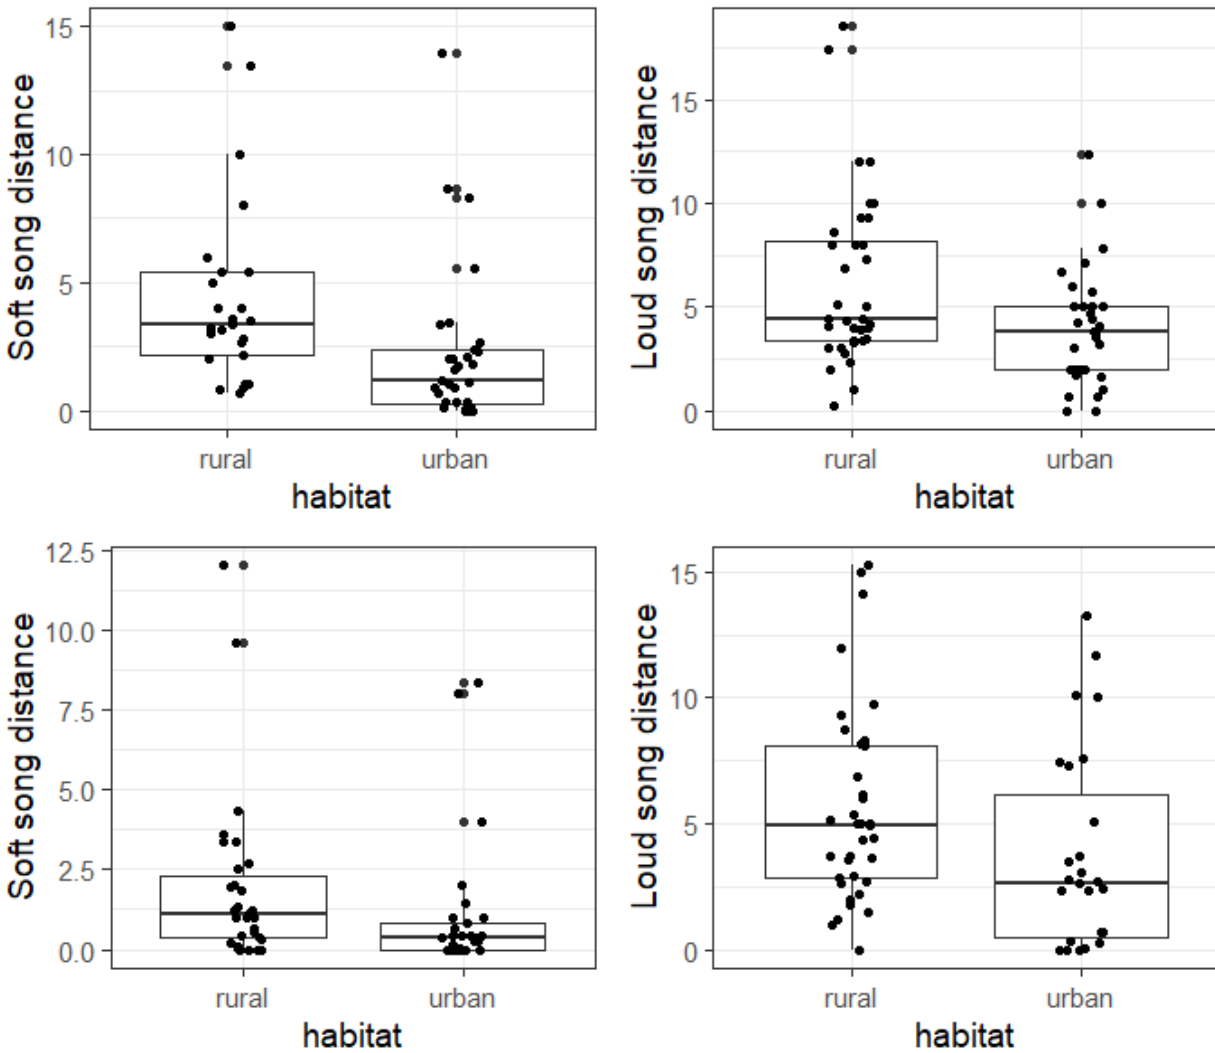

582

583 Figure 3. Song distances during the pre-mount (a, b) and mount (c,d) periods. The dots are  
584 individual data points, boxes indicate the interquartile range and medians. Whiskers are 95%  
585 confidence intervals. The left panels show distances at which soft songs are sung, the right  
586 panels show distances at which loud songs are sung.

587

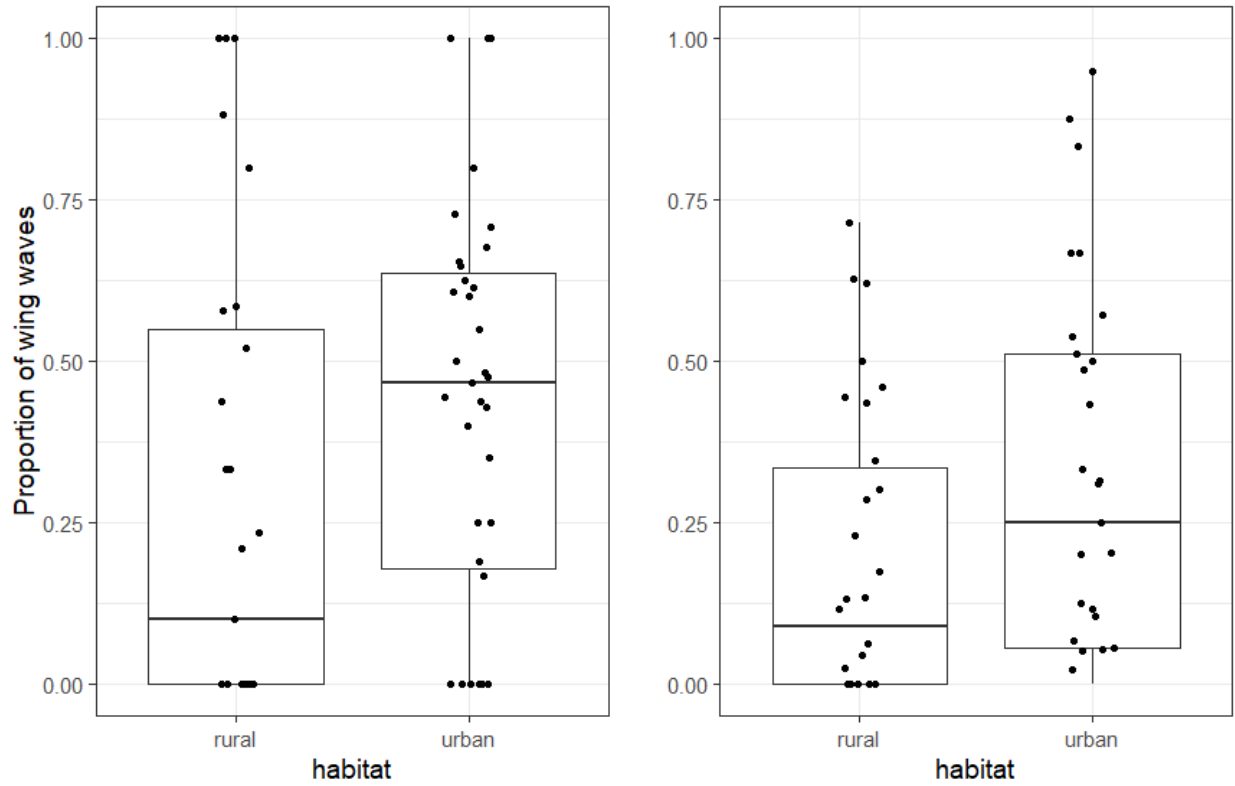

588

589 Figure 4. Proportion of wing waves among the sum of soft songs and wing waves for (a) pre-  
590 mount period and (b) mount period. The dots are individual data points, boxes indicate the  
591 interquartile range and medians. Whiskers are 95% confidence intervals.

592
